# Supplementary material for: Effect of dihydropyrimidine dehydrogenase single nucleotide polymorphisms on prognosis of breast cancer patients with chemotherapy
Source: PubMed Central journal article supplement (PMC5762379; doi:10.18632/oncotarget.23033), 2017-12-08
Supplement: oncotarget-08-112060-s001.pdf [file oncotarget-08-112060-s001.pdf]

# Effect of dihydropyrimidine dehydrogenase single nucleotide polymorphisms on prognosis of breast cancer patients with chemotherapy

## SUPPLEMENTARY MATERIALS

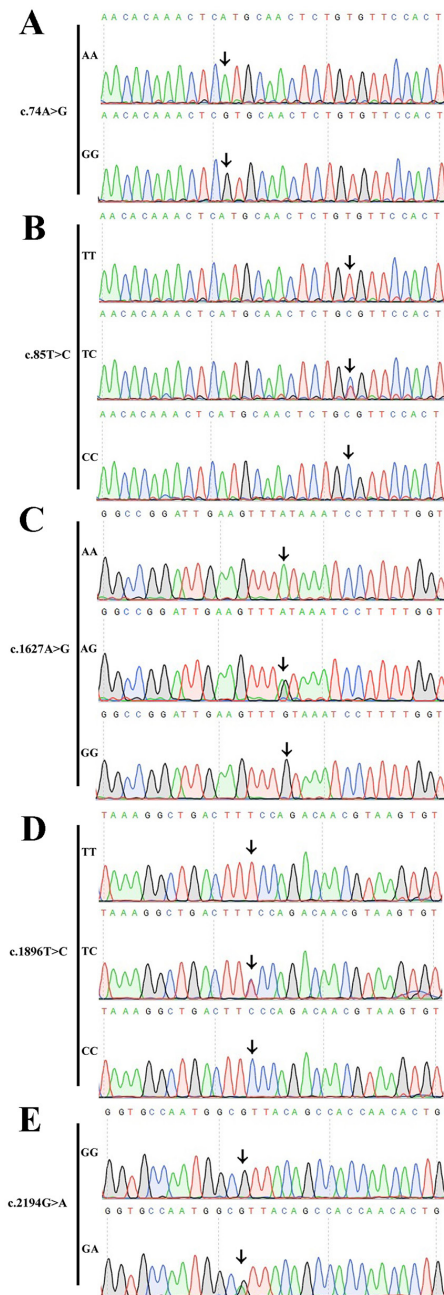

**Supplementary Figure 1: Genomic DNA sequencing of the 5 SNPs of *DPYD*. (A) c.74A>G. (B) c.85T>C. (C) c.1627A>G. (D) c.1896T>C. (E) c.2194G>A.**

Luminal subtype

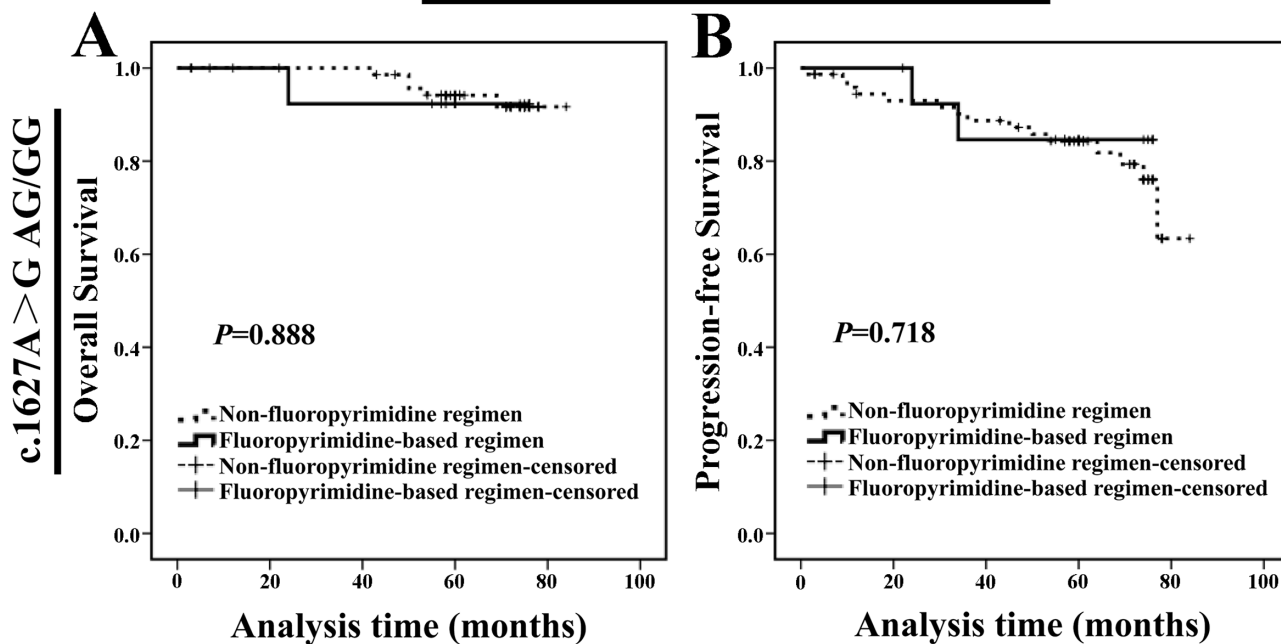

**Supplementary Figure 2: Survival analysis of luminal breast cancer patients treated with fluoropyrimidine-based regimen with c.1627A>G AG/GG genotype. (A)** For luminal subtype, c.1627A>G AG/GG genotype carriers treated with fluoropyrimidine-based regimen exhibited a similar OS compared with those treated with non-fluoropyrimidine regimen. **(B)** For luminal subtype, c.1627A>G AG/GG genotype carriers treated with fluoropyrimidine-based regimen exhibited a similar PFS compared with those treated with non-fluoropyrimidine regimen.

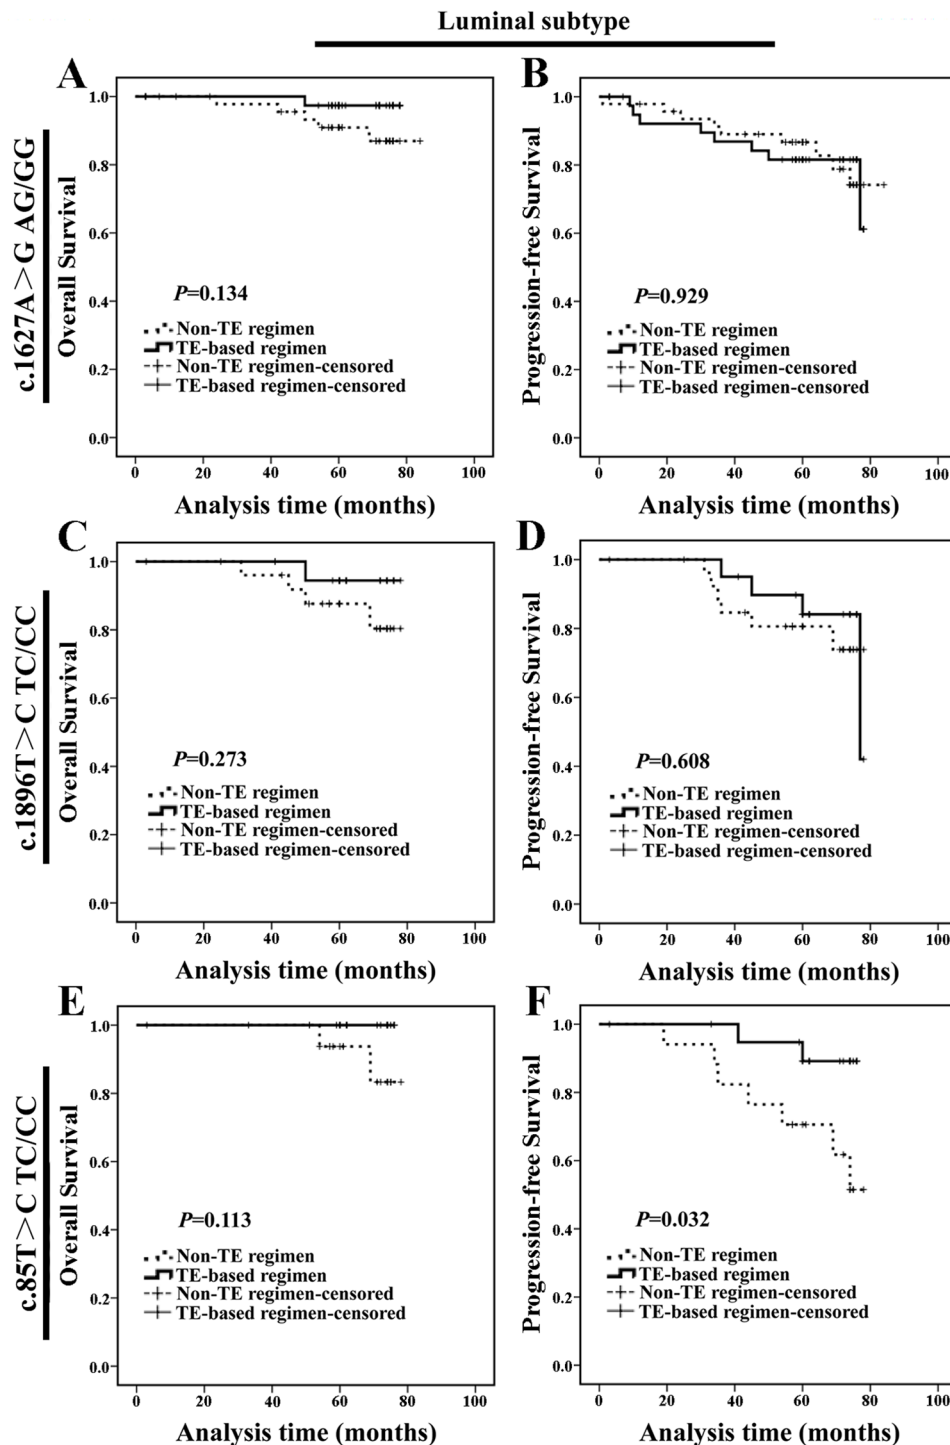

**Supplementary Figure 3: Survival analysis of luminal breast cancer patients treated with TE-based regimen with 3 different *DPYD* SNPs.** (A-B) For luminal subtype, c.1627A>G AG/GG genotype carriers treated with TE-based regimen exhibited a similar OS and PFS compared with those treated with non-TE regimen. (C-D) For luminal subtype, c.1896T>C TC/CC genotype carriers treated with TE-based regimen exhibited a similar OS and PFS compared with those treated with non-TE regimen. (E-F) For luminal subtype, c.85T>C TC/CC genotype carriers treated with TE-based regimen exhibited a similar OS compared with those treated with non-TE regimen.

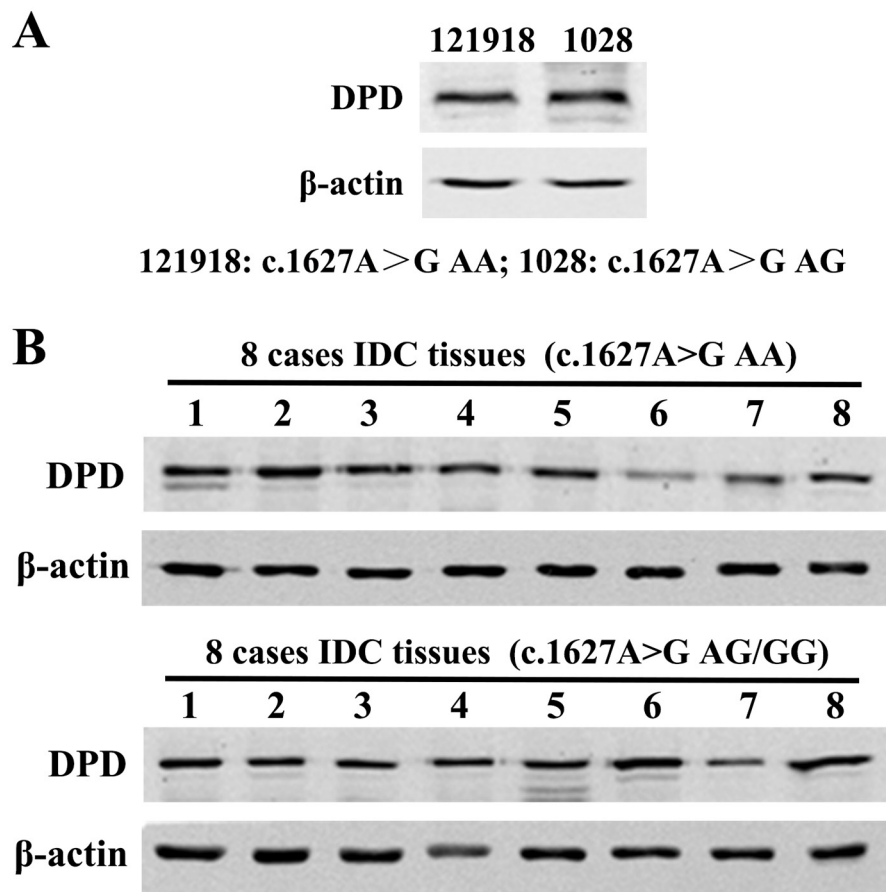

**Supplementary Figure 4: The effect of c.1627A>G AG/GG on the expression of DPD protein.** (A) Western blot analysis of DPD expression in non-luminal breast cancer derived cells (121918: c.1627A>G AA; 1028: c.1627A>G AG). (B) Western blot analysis of DPD expression in breast cancer tissues from IDC patients with c.1627A>G AA genotype (8 cases) and c.1627A>G AG/GG genotype (8 cases), respectively.  $\beta$ -actin was used as a loading control.

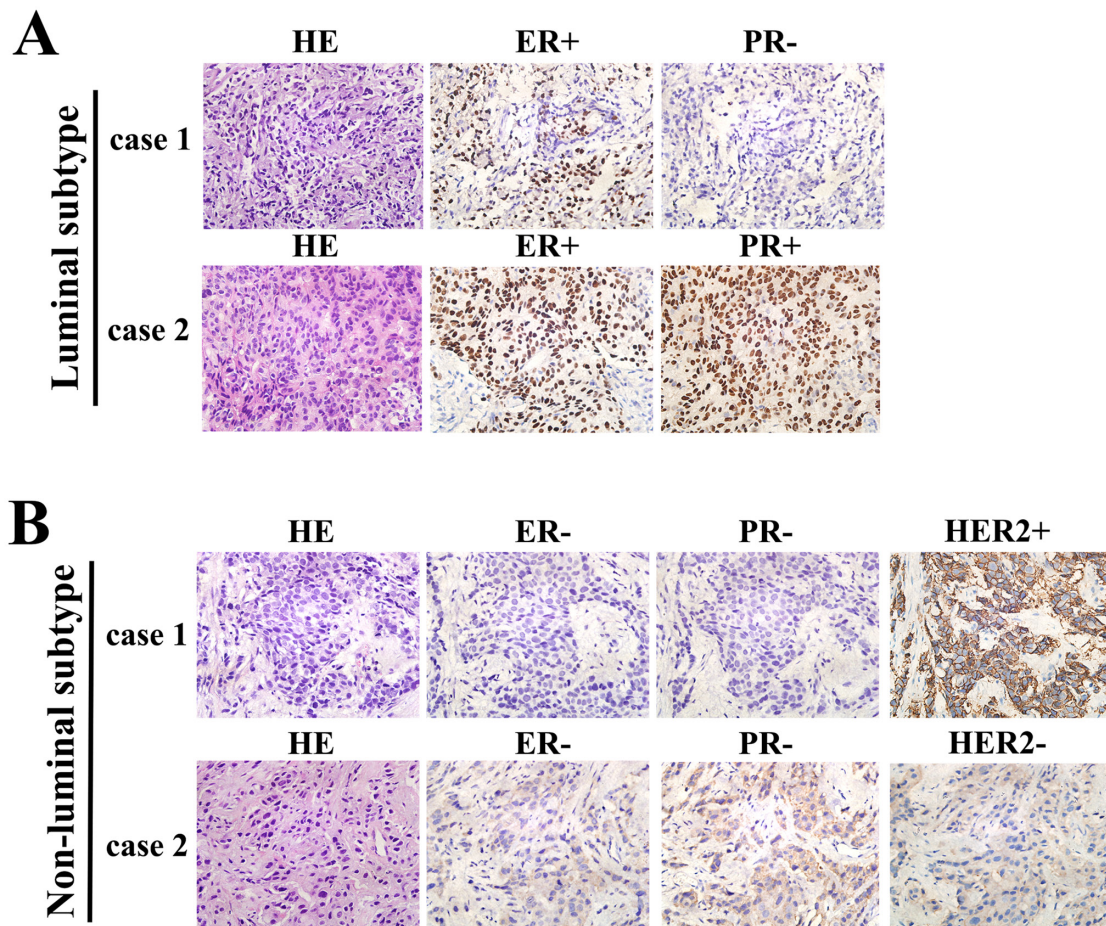

**Supplementary Figure 5: Representative immunohistochemical images of luminal and non-luminal breast cancer patients.** (A) Representative immunohistochemical images of luminal breast cancer patients (2 cases, magnification 400×). (B) Representative immunohistochemical images of non-luminal breast cancer patients (2 cases, magnification 400×).

Supplementary Table 1: The association between *DPYD* SNPs status and clinicopathological characteristics

| Pathological features                         | Cases | <i>DPYD</i> gene |               | $r_s$  | P value |
|-----------------------------------------------|-------|------------------|---------------|--------|---------|
|                                               |       | Wild type        | Non-wild type |        |         |
| Age                                           | 331   |                  |               | -0.054 | 0.323   |
| <50                                           |       | 44 (33.3)        | 88 (66.7)     |        |         |
| ≥50                                           |       | 77 (38.7)        | 122 (61.3)    |        |         |
| Histological grade <sup>a</sup>               | 288   |                  |               | -0.020 | 0.737   |
| Grade I                                       |       | 5 (41.7)         | 7 (58.3)      |        |         |
| Grade II                                      |       | 72 (33.8)        | 141 (66.2)    |        |         |
| Grade III                                     |       | 24 (38.1)        | 39 (61.9)     |        |         |
| Tumor size <sup>a</sup>                       | 306   |                  |               | -0.087 | 0.129   |
| ≤5                                            |       | 93 (34.7)        | 175 (65.3)    |        |         |
| >5                                            |       | 18 (47.4)        | 20 (52.6)     |        |         |
| Lymph node status <sup>a</sup>                | 306   |                  |               | -0.030 | 0.598   |
| pN0                                           |       | 55 (37.7)        | 91 (62.3)     |        |         |
| pN1                                           |       | 17 (22.7)        | 58 (77.3)     |        |         |
| pN2                                           |       | 23 (48.9)        | 24 (51.1)     |        |         |
| pN3                                           |       | 16(42.1)         | 22 (57.9)     |        |         |
| ER <sup>a</sup>                               | 329   |                  |               | 0.033  | 0.550   |
| Negative                                      |       | 40 (38.8)        | 63 (61.2)     |        |         |
| Positive                                      |       | 80 (35.4)        | 146 (64.6)    |        |         |
| PR <sup>a</sup>                               | 329   |                  |               | 0.067  | 0.225   |
| Negative                                      |       | 50 (40.7)        | 73 (59.3)     |        |         |
| Positive                                      |       | 70 (34.0)        | 136 (66.0)    |        |         |
| HER2 <sup>a</sup>                             | 327   |                  |               | 0.014  | 0.798   |
| Negative                                      |       | 79 (36.6)        | 137 (63.4)    |        |         |
| Positive                                      |       | 39 (35.1)        | 72 (64.9)     |        |         |
| Molecular subtype <sup>a</sup>                | 326   |                  |               | 0.023  | 0.683   |
| Luminal                                       |       | 82 (35.5)        | 149 (64.5)    |        |         |
| Non-luminal                                   |       | 36 (37.9)        | 59 (62.1)     |        |         |
| Recurrence or distant metastasis <sup>a</sup> | 324   |                  |               | 0.095  | 0.087   |
| Negative                                      |       | 108 (38.2)       | 175 (61.8)    |        |         |
| Positive                                      |       | 10 (24.4)        | 31 (75.6)     |        |         |

Wild type: patients with c.85T>C TT, c.1627A>G AA and c.1896T>C TT simultaneously.

Non-wild type: patients with whichever of mutations at c.85T>C, c.1627A>G or c.1896T>C.

<sup>a</sup>Some missing data.

P values were calculated by Spearman's Rank-Correlation test.

Supplementary Table 2: Baseline characteristics of the breast cancer patients with non-wild type *DPYD*

| Pathological features           | Cases | Chemotherapy                 |                                | $\chi^2$ | P value            |
|---------------------------------|-------|------------------------------|--------------------------------|----------|--------------------|
|                                 |       | Non-Fluoropyrimidine regimen | Fluoropyrimidine-based regimen |          |                    |
| Age                             | 197   |                              |                                | 0.638    | 0.424 <sup>b</sup> |
| <50                             |       | 72 (85.7)                    | 12 (14.3)                      |          |                    |
| ≥50                             |       | 92 (81.4)                    | 21 (18.6)                      |          |                    |
| Histological grade <sup>a</sup> | 175   |                              |                                | 2.373    | 0.305 <sup>b</sup> |
| Grade I                         |       | 5 (71.4)                     | 2 (28.6)                       |          |                    |
| Grade II                        |       | 111 (85.4)                   | 19 (14.6)                      |          |                    |
| Grade III                       |       | 29 (76.3)                    | 9 (23.7)                       |          |                    |
| Tumor size <sup>a</sup>         | 183   |                              |                                |          | 0.191 <sup>c</sup> |
| ≤5                              |       | 140 (85.4)                   | 24 (14.6)                      |          |                    |
| >5                              |       | 14 (73.7)                    | 5 (26.3)                       |          |                    |
| Lymph node status <sup>a</sup>  | 183   |                              |                                |          | 0.958 <sup>c</sup> |
| pN0                             |       | 73 (83.0)                    | 15 (17.0)                      |          |                    |
| pN1                             |       | 44 (86.3)                    | 7 (13.7)                       |          |                    |
| pN2                             |       | 19 (82.6)                    | 4 (17.4)                       |          |                    |
| pN3                             |       | 18 (85.7)                    | 3 (14.3)                       |          |                    |
| ER status                       | 197   |                              |                                | 1.495    | 0.221 <sup>b</sup> |
| Negative                        |       | 47 (78.3)                    | 13 (21.7)                      |          |                    |
| Positive                        |       | 117 (85.4)                   | 20 (14.6)                      |          |                    |
| PR status                       | 197   |                              |                                | 0.822    | 0.365 <sup>b</sup> |
| Negative                        |       | 56 (80.0)                    | 14 (20.0)                      |          |                    |
| Positive                        |       | 108 (85.0)                   | 19 (15.0)                      |          |                    |
| HER2 status                     | 197   |                              |                                | 2.663    | 0.103 <sup>b</sup> |
| Negative                        |       | 109 (86.5)                   | 17 (13.5)                      |          |                    |
| Positive                        |       | 55 (77.5)                    | 16 (22.5)                      |          |                    |

<sup>a</sup>Some missing data.<sup>b</sup>Two-sided  $\chi^2$  test.<sup>c</sup>Fisher's exact test.

Supplementary Table 3: Baseline characteristics of the non-luminal subtype patients with non-wild type *DPYD*

| Pathological features           | Cases | Chemotherapy                 |                                | P value <sup>b</sup> |
|---------------------------------|-------|------------------------------|--------------------------------|----------------------|
|                                 |       | Non-Fluoropyrimidine regimen | Fluoropyrimidine-based regimen |                      |
| Age                             | 56    |                              |                                | 0.258                |
| <50                             |       | 13 (92.9)                    | 1 (7.1)                        |                      |
| ≥50                             |       | 31 (73.8)                    | 11 (26.2)                      |                      |
| Histological grade <sup>a</sup> | 50    |                              |                                | 0.506                |
| Grade II                        |       | 24 (80.0)                    | 6 (20.0)                       |                      |
| Grade III                       |       | 14 (70.0)                    | 6 (30.0)                       |                      |
| Tumor size <sup>a</sup>         | 52    |                              |                                | 0.120                |
| ≤5                              |       | 38 (84.4)                    | 7 (15.6)                       |                      |
| >5                              |       | 4 (57.1)                     | 3 (42.9)                       |                      |
| Lymph node status <sup>a</sup>  | 52    |                              |                                | 0.419                |
| pN0                             |       | 26 (86.7)                    | 4 (13.3)                       |                      |
| pN1                             |       | 6 (75.0)                     | 2 (25.0)                       |                      |
| pN2                             |       | 5 (62.5)                     | 3 (37.5)                       |                      |
| pN3                             |       | 5 (83.3)                     | 1 (16.7)                       |                      |
| HER2 status                     | 56    |                              |                                | 0.322                |
| Negative                        |       | 20 (87.0)                    | 3 (13.0)                       |                      |
| Positive                        |       | 24 (72.7)                    | 9 (27.3)                       |                      |

<sup>a</sup>Some missing data.<sup>b</sup>Fisher's exact test.



Supplementary Table 4: Baseline characteristics of breast cancer patients with c.1627A&gt;G AG/GG genotype

| Pathological features           | Cases | Chemotherapy                 |                                | $\chi^2$ | P value            |
|---------------------------------|-------|------------------------------|--------------------------------|----------|--------------------|
|                                 |       | Non-Fluoropyrimidine regimen | Fluoropyrimidine-based regimen |          |                    |
| Age                             | 131   |                              |                                | 0.865    | 0.352 <sup>b</sup> |
| <50                             |       | 49 (86.0)                    | 8 (14.0)                       |          |                    |
| ≥50                             |       | 59 (79.7)                    | 15 (20.3)                      |          |                    |
| Histological grade <sup>a</sup> | 117   |                              |                                |          | 0.115 <sup>c</sup> |
| Grade I                         |       | 3 (60.0)                     | 2 (40.0)                       |          |                    |
| Grade II                        |       | 73 (85.9)                    | 12 (14.1)                      |          |                    |
| Grade III                       |       | 20 (74.1)                    | 7 (25.9)                       |          |                    |
| Tumor size <sup>a</sup>         | 125   |                              |                                |          | 0.059 <sup>c</sup> |
| ≤5                              |       | 95 (85.6)                    | 16 (14.4)                      |          |                    |
| >5                              |       | 9 (64.3)                     | 5 (35.7)                       |          |                    |
| Lymph node status <sup>a</sup>  | 125   |                              |                                |          | 0.919 <sup>c</sup> |
| pN0                             |       | 44 (80.0)                    | 11 (20.0)                      |          |                    |
| pN1                             |       | 35 (85.4)                    | 6 (14.6)                       |          |                    |
| pN2                             |       | 12 (85.7)                    | 2 (14.3)                       |          |                    |
| pN3                             |       | 13 (86.7)                    | 2 (13.3)                       |          |                    |
| ER status                       | 131   |                              |                                | 0.503    | 0.478 <sup>b</sup> |
| Negative                        |       | 34 (79.1)                    | 9 (20.9)                       |          |                    |
| Positive                        |       | 74 (84.1)                    | 14 (15.9)                      |          |                    |
| PR status                       | 131   |                              |                                | 0.074    | 0.785 <sup>b</sup> |
| Negative                        |       | 39 (81.2)                    | 9 (18.8)                       |          |                    |
| Positive                        |       | 69 (83.1)                    | 14 (16.9)                      |          |                    |
| HER2 status                     | 131   |                              |                                | 0.562    | 0.454 <sup>b</sup> |
| Negative                        |       | 70 (84.3)                    | 13 (15.7)                      |          |                    |
| Positive                        |       | 38 (79.2)                    | 10 (20.8)                      |          |                    |

<sup>a</sup>Some missing data.

<sup>b</sup>Two-sided  $\chi^2$  test.

<sup>c</sup>Fisher's exact test.

Supplementary Table 5: Baseline characteristics of the non-luminal subtype patients with c.1627A&gt;G AG/GG genotype

| Pathological features                 | Cases     | Chemotherapy                 |                                 | P value <sup>b</sup> |
|---------------------------------------|-----------|------------------------------|---------------------------------|----------------------|
|                                       |           | Non-Fluoropyrimidine regimen | Fluoropyrimidine -based regimen |                      |
| <b>Age</b>                            | <b>40</b> |                              |                                 | <b>0.404</b>         |
| <50                                   |           | 9 (90.0)                     | 1 (10.0)                        |                      |
| ≥50                                   |           | 22 (73.3)                    | 8 (26.7)                        |                      |
| <b>Histological grade<sup>a</sup></b> | <b>36</b> |                              |                                 | <b>0.443</b>         |
| Grade II                              |           | 17 (81.0)                    | 4 (19.0)                        |                      |
| Grade III                             |           | 10 (66.7)                    | 5 (33.3)                        |                      |
| <b>Tumor size<sup>a</sup></b>         | <b>37</b> |                              |                                 | <b>0.068</b>         |
| ≤5                                    |           | 27 (87.1)                    | 4 (12.9)                        |                      |
| >5                                    |           | 3 (50.0)                     | 3 (50.0)                        |                      |
| <b>Lymph node status<sup>a</sup></b>  | <b>37</b> |                              |                                 | <b>0.485</b>         |
| pN0                                   |           | 16 (88.9)                    | 2 (11.1)                        |                      |
| pN1                                   |           | 6 (75.0)                     | 2 (25.0)                        |                      |
| pN2                                   |           | 3 (60.0)                     | 2 (40.0)                        |                      |
| pN3                                   |           | 5 (83.3)                     | 1 (16.7)                        |                      |
| <b>HER2 status</b>                    | <b>40</b> |                              |                                 | <b>0.453</b>         |
| Negative                              |           | 12 (85.7)                    | 2 (14.3)                        |                      |
| Positive                              |           | 19 (73.1)                    | 7 (26.9)                        |                      |

<sup>a</sup>Some missing data.<sup>b</sup>Fisher's exact test.

Supplementary Table 6: Baseline characteristics of the breast cancer patients with non-wild type *DPYD*

| Pathological features           | Cases | Chemotherapy   |                  | $\chi^2$ | P value            |
|---------------------------------|-------|----------------|------------------|----------|--------------------|
|                                 |       | Non-TE regimen | TE-based regimen |          |                    |
| Age                             | 197   |                |                  | 0.463    | 0.496 <sup>b</sup> |
| <50                             |       | 39 (46.4)      | 45 (53.6)        |          |                    |
| ≥50                             |       | 58 (51.3)      | 55 (48.7)        |          |                    |
| Histological grade <sup>a</sup> | 175   |                |                  |          | 0.568 <sup>c</sup> |
| Grade I                         |       | 4 (57.1)       | 3 (42.9)         |          |                    |
| Grade II                        |       | 60 (46.2)      | 70 (53.8)        |          |                    |
| Grade III                       |       | 21(55.3)       | 17 (44.7)        |          |                    |
| Tumor size <sup>a</sup>         | 183   |                |                  | 0.101    | 0.751 <sup>b</sup> |
| ≤5                              |       | 80 (48.8)      | 84 (51.2)        |          |                    |
| >5                              |       | 10 (52.6)      | 9 (47.4)         |          |                    |
| Lymph node status <sup>a</sup>  | 183   |                |                  | 2.430    | 0.488 <sup>b</sup> |
| pN0                             |       | 42 (47.7)      | 46 (52.3)        |          |                    |
| pN1                             |       | 26 (51.0)      | 25 (49.0)        |          |                    |
| pN2                             |       | 9 (39.1)       | 14 (60.9)        |          |                    |
| pN3                             |       | 13 (61.9)      | 8 (38.1)         |          |                    |
| ER status                       | 197   |                |                  | 0.620    | 0.431 <sup>b</sup> |
| Negative                        |       | 27 (45.0)      | 33 (55.0)        |          |                    |
| Positive                        |       | 70 (51.1)      | 67 (48.9)        |          |                    |
| PR status                       | 197   |                |                  | 0.540    | 0.463 <sup>b</sup> |
| Negative                        |       | 32 (45.7)      | 38 (54.3)        |          |                    |
| Positive                        |       | 65 (51.2)      | 62 (48.8)        |          |                    |
| HER2 status                     | 197   |                |                  | 0.367    | 0.545 <sup>b</sup> |
| Negative                        |       | 60 (47.6)      | 66 (52.4)        |          |                    |
| Positive                        |       | 37 (52.1)      | 34 (47.9)        |          |                    |

<sup>a</sup>Some missing data.

<sup>b</sup>Two-sided  $\chi^2$  test.

<sup>c</sup>Fisher's exact test.

Supplementary Table 7: Baseline characteristics of breast cancer patients with c.1627A&gt;G AG/GG genotype

| Pathological features           | Cases | Chemotherapy   |                  | $\chi^2$ | P value            |
|---------------------------------|-------|----------------|------------------|----------|--------------------|
|                                 |       | Non-TE regimen | TE-based regimen |          |                    |
| Age                             | 131   |                |                  | 0.130    | 0.718 <sup>b</sup> |
| <50                             |       | 29 (50.9)      | 28 (49.1)        |          |                    |
| ≥50                             |       | 40 (54.1)      | 34 (45.9)        |          |                    |
| Histological grade <sup>a</sup> | 117   |                |                  |          | 0.352 <sup>c</sup> |
| Grade I                         |       | 4 (80.0)       | 1 (20.0)         |          |                    |
| Grade II                        |       | 42 (49.4)      | 43 (50.6)        |          |                    |
| Grade III                       |       | 16 (59.3)      | 11 (40.7)        |          |                    |
| Tumor size <sup>a</sup>         | 125   |                |                  | 0.050    | 0.824 <sup>c</sup> |
| ≤5                              |       | 59 (53.2)      | 52 (46.8)        |          |                    |
| >5                              |       | 7 (50.0)       | 7 (50.0)         |          |                    |
| Lymph node status <sup>a</sup>  | 125   |                |                  | 1.125    | 0.771 <sup>b</sup> |
| pN0                             |       | 28 (50.9)      | 27 (49.1)        |          |                    |
| pN1                             |       | 23 (56.1)      | 18 (43.9)        |          |                    |
| pN2                             |       | 6 (42.9)       | 8 (57.1)         |          |                    |
| pN3                             |       | 9 (60.0)       | 6 (40.0)         |          |                    |
| ER status                       | 131   |                |                  | 0.378    | 0.539 <sup>b</sup> |
| Negative                        |       | 21 (48.8)      | 22 (51.2)        |          |                    |
| Positive                        |       | 48 (54.5)      | 40 (45.5)        |          |                    |
| PR status                       | 131   |                |                  | 0.011    | 0.918 <sup>b</sup> |
| Negative                        |       | 25 (52.1)      | 23 (47.9)        |          |                    |
| Positive                        |       | 44 (53.0)      | 39 (47.0)        |          |                    |
| HER2 status                     | 131   |                |                  | 0.217    | 0.641 <sup>b</sup> |
| Negative                        |       | 45 (54.2)      | 38 (45.8)        |          |                    |
| Positive                        |       | 24 (50.0)      | 24 (50.0)        |          |                    |

<sup>a</sup>Some missing data.

<sup>b</sup>Two-sided  $\chi^2$  test.

<sup>c</sup>Fisher's exact test.

Supplementary Table 8: Baseline characteristics of the non-luminal subtype patients (n=40) with c.1627A&gt;G AG/GG genotype

| Pathological features           | Cases | Chemotherapy   |                  | $\chi^2$ | P value            |
|---------------------------------|-------|----------------|------------------|----------|--------------------|
|                                 |       | Non-TE regimen | TE-based regimen |          |                    |
| Age                             | 40    |                |                  | 0.533    | 0.465 <sup>b</sup> |
| <50                             |       | 6 (60.0)       | 4 (40.0)         |          |                    |
| ≥50                             |       | 14 (46.7)      | 16 (53.3)        |          |                    |
| Histological grade <sup>a</sup> | 36    |                |                  | 0.003    | 0.955 <sup>b</sup> |
| Grade II                        |       | 11 (52.4)      | 10 (47.6)        |          |                    |
| Grade III                       |       | 8 (53.3)       | 7 (46.7)         |          |                    |
| Tumor size <sup>a</sup>         | 37    |                |                  |          | 0.383 <sup>c</sup> |
| ≤5                              |       | 13 (41.9)      | 18 (58.1)        |          |                    |
| >5                              |       | 4 (66.7)       | 2 (33.3)         |          |                    |
| Lymph node status <sup>a</sup>  | 37    |                |                  |          | 0.669 <sup>c</sup> |
| pN0                             |       | 7 (38.9)       | 11 (61.1)        |          |                    |
| pN1                             |       | 4 (50.0)       | 4 (50.0)         |          |                    |
| pN2                             |       | 2 (40.0)       | 3 (60.0)         |          |                    |
| pN3                             |       | 4 (66.7)       | 2 (33.3)         |          |                    |
| HER2 status                     | 40    |                |                  | 0.440    | 0.507 <sup>b</sup> |
| Negative                        |       | 6 (42.9)       | 8 (57.1)         |          |                    |
| Positive                        |       | 14 (53.8)      | 12 (46.2)        |          |                    |

<sup>a</sup>Some missing data.<sup>b</sup>Fisher's exact test.<sup>c</sup>Fisher's exact test.

Supplementary Table 9: Baseline characteristics of the non-luminal subtype patients (n=54) with c.1627A&gt;G AG/GG genotype

| Pathological features           | Cases           | Chemotherapy                       |                      | $\chi^2$ | P value            |
|---------------------------------|-----------------|------------------------------------|----------------------|----------|--------------------|
|                                 |                 | Fluoropyrimidine<br>-based regimen | TE<br>-based regimen |          |                    |
| Age                             | 54              |                                    |                      | 0.980    | 0.322 <sup>b</sup> |
| <50                             |                 | 8 (53.3)                           | 7 (46.7)             |          |                    |
| ≥50                             |                 | 15 (38.5)                          | 24 (61.5)            |          |                    |
| Histological grade <sup>a</sup> | 51 <sup>a</sup> |                                    |                      | 2.951    | 0.086 <sup>b</sup> |
| Grade II                        |                 | 11 (35.5)                          | 20 (64.5)            |          |                    |
| Grade III                       |                 | 12 (60.0)                          | 8 (40.0)             |          |                    |
| Tumor size <sup>a</sup>         | 51 <sup>a</sup> |                                    |                      |          | 0.214 <sup>c</sup> |
| ≤5                              |                 | 17 (37.8)                          | 28 (62.2)            |          |                    |
| >5                              |                 | 4 (66.7)                           | 2 (33.3)             |          |                    |
| Lymph node status <sup>a</sup>  | 51 <sup>a</sup> |                                    |                      | 0.907    | 0.341 <sup>b</sup> |
| negative                        |                 | 14 (46.7)                          | 16 (53.3)            |          |                    |
| positive                        |                 | 7 (33.3)                           | 14 (66.7)            |          |                    |

<sup>a</sup>Some missing data.<sup>b</sup>Two-sided  $\chi^2$  test.<sup>c</sup>Fisher's exact test.
